# Supplementary material
Source: PubMed Central journal article supplement (PMC4494996)
Supplement: NIHMS668278-supplement-1.pdf [file NIHMS668278-supplement-1.pdf]

**Fig. S1. The necroptotic in MS tissue (Suppl. to Figure 1.)** (A) Western blotting analysis and quantification of fresh frozen *post mortem* brain lysates (solubilized in Triton/SDS buffer) of normal and white matter lesions from control and MS patients, respectively, for RIPK1 and RIPK3 levels. (B) Representative western blotting analysis of control samples and white matter lesions in MS samples for RIPK1 levels in both Triton/SDS-soluble (bottom) and Triton/SDS-insoluble (top) fractions; actin was used as a loading control (right panels). (C) Enlarged images of **Fig. 1E**: anti-RIPK1 immunostaining of *post mortem* brain sections from a patient with primary progressive MS. Higher magnification images of the boxed regions are depicted below. (D) Immunostaining of *post mortem* cortical near lesion sections from a MS patient and sections of normal appearing white matter (NAWM) from a control individual using anti-RIPK1 and R461 antibody, a human oligodendrocyte marker (upper panels) (He et al., 2004).

**Fig. S2. Phosphorylation of the necroptotic machinery as a marker for activation. (Suppl. to Figure 1-3)** (A) 293T cells transfected with expression vectors of GFP, RIPK1 or kinase dead (K45M) RIPK1 (KD-RIPK1) were treated with either vehicle (-) or TNF $\alpha$  for the indicated periods of times in minutes. The cell lysates were analyzed by western blotting using anti-p-S14/15-RIPK1 and RIPK1. (B) Wild-type (WT) or RIPK1 deficient (RIPK1[def]) Jurkat cells were treated with either vehicle (-) or TNF $\alpha$  (T) for 15 minutes with or without 7-Cl-O-Nec-1 (7N-1). The cell lysates were analyzed by western blotting using anti-p-S14/15-RIPK1 and RIPK1. (C) Western blotting analysis and

quantification of lysates from cultured rat oligodendrocytes treated with increasing concentrations of mTNF $\alpha$  (100 ng/ml for indicated periods of times in minutes) and probed with anti-p-S14/15-RIPK1, RIPK1 and  $\beta$ -actin. **(D)** 293T cells were transfected with an expression vector for RIPK1. The cell lysates were treated with either lambda phosphatase or vehicle for 30 min at 37°C, and analyzed by western blotting using anti-p-S14/15-RIPK1 and RIPK1. **(E)** 293T cells transfected with expression vectors of wild-type RIPK1 or RIPK1 Ser166Ala (S166A) mutant. The cell lysates were analyzed by western blotting using anti-p-Ser166-RIPK1 and RIPK1. **(F)** HT29 cells were treated with either vehicle or mTNF $\alpha$  (100 ng/ml), SM164 (SMAC mimetic that can promote the degradation of cIAP1/2; 300 nM) and zVAD.fmk (20  $\mu$ M) to promote the activation of necroptosis in the presence or absence of 7N-1 for 6h. The cell lysates were treated with either lambda phosphatase or vehicle for 30 min at 37°C, and then probed with anti-p-S166-RIPK1 and RIPK1, with anti-p-S227-RIPK3 and RIPK3, and with anti-p-T358-MLKL and MLKL. **(G)** phospho-MLKL immunostaining of *post mortem* brain sections from a control individual showed little immunoreactivity in cortical white matter as a control for Fig. 2A. **(H)** Primary rat neurons, astrocytes (Ast), microglia (Mg) oligodendrocytes (Olig), and mixed cultured cells (Mix) were grown *in vitro* for the indicated number of days; for oligodendrocytes we used both a mixed culture preparation grown in BDM (Mixed BDM), as well as a purified oligodendrocyte population grown in OPC promoting medium (OPC). The cell lysates were prepared and subjected to western blotting analysis. The levels of key mediators of necroptosis, MLKL, RIPK1, and RIPK3, were examined. MBP, NeuN, IBA1 and GFAP were used as markers for oligodendrocytes, neurons, microglia and astrocytes, respectively. Actin was a loading

control. **(I)** Data in the bar graph is the average fold loss or enrichment of selected myelin associated proteins identified by proteomic analysis in the urea fractions of MS compared to that of control samples.

**Fig. S3. Protection of mature oligodendrocytes by inhibiting RIPK1 kinase.** **(A)** Mice (**Suppl. to Figure 4,5**) were on cuprizone-containing diet with or without 7N-1 for 4.5 weeks and the sections of corpus callosum were immunostained with CC1 (green), a marker for mature oligodendrocytes and Hoechst dye for nuclei (blue). The numbers of CC1+ cells in the corpus callosum in the indicated experimental groups were quantified by counting z-series reconstructions with depth of 10  $\mu\text{m}$  using sections from the medial corpus callosum (2 slices per animal, 4-5 animals were used per group) (bar graph on the right). Data are represented as the normalized means  $\pm$  SEM, (\* $p < 0.05$ , \*\* $p < 0.01$ ) **(B)** Representative images of corpus callosum sections immunostained for the microglial marker, IBA1 and the density of cells/ $100\mu\text{m}^2$  in the CC were quantified. Data are means  $\pm$  SEM,  $n=5-8$  per group. (\* $p < 0.05$ ). **(C)** Mice were fed either control or 0.2 % cuprizone containing diet for 3 weeks, at which point animals were separated into two groups with the same starting weight and behavioral performance was measured on the rotarod for a subsequent 2 weeks. The time until mice fell off the rotarod was recorded. Data are means  $\pm$  SEM,  $n=7-9$  per group. (\* $p < 0.05$ ). The increased ability to stay longer on rotarod with 7N-1 treated group is similar to that of wt mice and reflects learning from daily practice. **(D)** Representative images of sections from medial corpus callosum immunostained with anti-RIPK1 and different cell type markers to show the expression of RIPK1 in various cell types of the CNS including astrocytes (GFAP), microglia

(IBA1), and the cells in the oligodendrocyte lineage (NG2, OPC progenitor cells; Olig2, oligodendrocytes; CC1, oligodendrocytes). The number of each cell type that was also positive for RIPK1 was quantified by counting z-series reconstructions with depth of 10  $\mu\text{m}$  using sections from the medial corpus callosum (30-40 cells were counted per slice; 1-2 slices per animal; 3-4 animals were used per group) (bar graph on the right). Data are represented as fractions of the cells that are positive for RIPK1 divided by the total cell numbers counted for each cell type. **(E)** Representative images of sections from medial CC show the increase of RIPK1 reactivity and ThioS staining, in cuprizone treated animals as compared to control treated animals following 5 weeks of cuprizone treatment. **(F)** Representative images of sections from medial corpus callosum in control and cuprizone treated mice show a more punctate staining of A11, an antibody that recognize a peptide backbone epitope that is common to amyloid oligomers. **(G)** Representative images of sections from medial corpus callosum in control and cuprizone treated mice immunostained with anti-RIPK1 and the amyloid oligomer specific antibody A11. **(H)** Wild-type or RIPK3 KO mice were fed either control or 0.2 % cuprizone containing diet for the indicated times; corpus callosum was microdissected, lysed and sequentially separated as Triton (1%) soluble, RIPA (SDS) soluble and urea soluble fractions and analyzed by western blot analysis using antibodies against RIP1 and normalized to  $\beta$ -actin. The quantifications were shown as bar graphs below. Data are represented as the normalized means  $\pm$  SEM, n= replicates per group (\*p<0.05).

**Fig. S4. The effect of 7N-1 in the EAE model. (Suppl. to Figure 6)** **(A)** Representative images of EAE spinal cord sections immunostained with anti-RIPK1, anti-IBA1 and

DAPI (top) and anti-RIPK1, anti-Olig2 and DAPI (bottom). White box insets depict a higher magnification image. The number of each cell type that was also positive for RIPK1 was quantified by counting z-series reconstructions with depth of 10  $\mu\text{m}$  using sections from the medial corpus callosum (30-40 cells were counted per slice; 1-2 slices per animal; 3-4 animals were used per group) (bar graph on the right). Data are represented as fractions of the cells that are positive for RIPK1 divided by the total cell numbers counted for each cell type. **(B)** The weight of vehicle (veh) and 7N-1 treated animals (from day 0) **(A)** and weight after immunization using MOG 35–55 in CFA from three independent experiments. Data represented as the mean  $\pm$  SE; n = 8-10 animals per group; to assess statistical difference between vehicle and 7N-1 treated animals, student's t-test was at each time point, (\*p<0.05, \*\*p<0.01). **(C)** Spinal cords of vehicle (veh) and 7N-1 treated animals (dosing starting from day 6 after immunization) after 18 days of treatment were lysed and subjected to ELISA for IL6 and IL1 $\beta$ . Data represented as the mean  $\pm$  SE; n = 5 animals per group (\*p<0.05). **(D)** Spleens of either control or MOG immunized animals in the presence of vehicle or 7N-1 for 15-17 days were dissected and representative EAE induced spleens are shown. Spleens were weighed and normalized to animal body weight. Data represented as mean  $\pm$  SE; n's are depicted for each group. **(E)** Serum MOG peptide reactive antibody was measured by peptide adsorbed ELISA. Splenic cell composition was evaluated after immunization in vehicle and 7N-1 treated animals; experiments were performed in triplicate. **(F)** RBC-lysed splenic cells from animals with indicated treatment were immunostained with markers for B-cells (B220), macrophages (CD11b), and T-cells (CD3), and subjected to FACS analysis. **(G)** RBC-lysed splenic cells were cultured on CD3 coated plates and treated with either vehicle or

MOG peptide and cell number was determined following 96 h of incubation, as well as (H) IL6 production by ELISA; experiments were performed on 3-4 animals per experimental group. (I) HUVECs were treated with recombinant human TNF  $\alpha$  in the presence of either vehicle or 7N-1 and the induction of VCAM was examined by western blotting analysis. Quantification of band intensity showed a robust TNF  $\alpha$  - induced VCAM increase which was not affected by 7N-1. Data represented as mean  $\pm$  SE; n = 3. (J) Adoptive transfer of MOG primed GFP-splenocytes and lymphocytes ( $5 \times 10^6$  cells/animal) into naïve animals. 7N-1 did not alter the amount of GFP-positive cells in the CNS, as assessed by western blotting analysis of spinal cord lysates for GFP reactivity (K) nor the levels of GFP+ percoll isolated mononuclear cells in the spinal cord, as assessed by FACs. Data represented as mean  $\pm$  SE; n = 3-4 animals per group.

**Fig. S5. RIPK3 deficiency attenuates EAE-induced neurological deficit. (Suppl. to Figure 6)** (A) Representative images of spinal cord sections from control and after EAE induction immunostained with anti-RIPK1, anti-RIPK3 and DAPI to show significantly increased RIPK1 immunostaining after induction of EAE within an inflammatory lesion while RIPK3 immunostaining was not markedly increased following induction of EAE. The cells within an inflammatory lesion in the spinal cord white matter or corresponding area in control spinal cord were identified by DAPI positivity; the percentages of RIPK1 (orange), RIPK3 (blue) or RIPK1, RIPK3 double positive cells (pink) are quantified in a bar graph (129 cells from 6 images from 3 animals were used for the control group, and 1283 cells from 10 images from 5 animals were used for the EAE group). (B) The levels of RIPK1 and RIPK3 after the induction of EAE as determined by western blotting

analysis. **(C)** Clinical scores of WT and RIPK3<sup>-/-</sup> after immunization using MOG 35–55 in CFA. The clinical scores of three experiments were evaluated for 18 days. Data represented as mean ± SE; n = 8 animals per group. To assess statistical difference between vehicle and 7N-1 treated animals, student's t-test was at each time point (\*p<0.05). **(D)** Splenic cell composition was evaluated after immunization in WT and RIPK3<sup>-/-</sup> animals. RBC-lysed splenic cells were stained with markers for macrophages (CD11b), B-cells (B220), and T-cells (CD3), and subjected to FACS analysis. Data is summarized in the table. Data represented as mean ± SE; n = 4 animals per group.

**Fig. S6. Morphological and biochemical features of oligodendrocyte cell death.**

**(Suppl. to Figure 7)** **(A)** Representative image of a primary rat oligodendrocyte immunostained with anti-RIPK1, anti-RIPK3, and MBP and DAPI; the merged image is shown on the right. **(B-C)** Primary mixed rat oligodendrocytes were treated with 100ng/mL(TNF100) of recombinant mouse TNF  $\alpha$  or staurosporine (STS; 500 nM). The cell viability was determined by the Toxilight (Lonza) 6 or 24 h after treatment **(B)**. The cell lysates were used to assess the levels of pro- and active caspase-3 by western blotting analysis **(C)**. STS treatment was a control for caspase-3 activation in apoptosis. **(D)** Oligodendrocytes were pre-treated with 100ng/mL (TNF100) of recombinant mouse TNF $\alpha$  for 3 h and then imaged continuously in the presence of propidium iodide (PI) and *Alexa Fluor 488 annexin V* for 15 hours. Each image was acquired at 5 min intervals. The first 9 hours of images are shown in the montage. A neighboring dead cell is shown as being PI-positive in all images; the yellow arrows indicate the swelling of the cell, which occurred before it became PI-positive.

**Fig. S7. Plasma and CNS levels of 7N-1 following administration of the compound.**

**(Suppl. to Methods for 7N-1 delivery)** (A) Animals were either given 7N-1 in their drinking water for 24 h ad libitum and either sacrificed in the morning or injected with a single IP injection (10 mg/kg) of 7N-1 and sacrificed at either 1 h or 8 h after the IP injection in the presence of 7N-1 water. 7N-1 levels were assessed in both the plasma and brain by HPLC. Molarity was calculated based on a molecular weight of 270 MW for 7-Cl-O-7N-1. (B) Plasma 7N-1 concentrations were analyzed by LC-MS/MS at different time points after a single 7N-1 administration (1 mg/kg). (C) Plasma concentration versus time data was subjected to non-compartmental analysis using the pharmacokinetic program WinNonLin v. 4.1 to obtain pharmacokinetic parameters for males and females. Each time point represents a mean of 3 plasma level determinations, from 3 separate mice, sacrificed at the appropriate interval post-dosing.

**Supplemental Movie, Table legends:**

**Movie S1. (Suppl. to Figure 7)**

Primary cultured oligodendrocytes were pre-treated with 100ng/mL (TNF100) of recombinant mouse TNF $\alpha$  for 3 h and then imaged continuously in the presence of propidium iodide (PI) and *Alexa Fluor 488 annexin V*, for 15 hours. Each image was acquired at 5 min intervals. A neighboring dead cell is shown as being PI-positive in all images; the yellow arrows indicate the swelling of the cell, which precedes it becoming PI-positive.



**Table S1. The cumulative data from all fresh frozen pathological samples of human control and MS patients analyzed as semi-quantitative measurements using western blot analysis describing the expression of MAG, RIP1 and FLIP<sub>L</sub> and caspase-8 (p43/41). (Suppl. to Figure 1)** RIP1(s): RIP1 in Triton (1%)/SDS soluble extraction. RIP1(u): RIP1 in the urea fraction and RIP3(u) in the urea fraction. RIP1, Casp8, cFLIP<sub>L</sub> and myelin were examined by western blotting analysis. The levels of RIP1, caspase-8 C43 fragment, cFLIP<sub>L</sub> and myelin were scored as +++++ (very strong), +++ (strong), ++ (moderate), + (weak), – (no) and N/A (not examined). CTL: age matched human control cases. MS: MS patient samples.

**Table S2. Genes that are differentially regulated in chronic active lesions vs. inactive lesions in MS and have also been identified as regulators of necroptosis. (Suppl. to Figure 1)** The table lists genes that were identified in a microarray study that were up regulated in chronic active lesions vs. inactive lesions (Selmaj and Raine, 1988) and were also identified as either protective against necroptosis (blue, negative z-score) or enhancers of necroptosis (red, positive z-score) in L929 cells (Hitomi et al., 2008).

**Table S3. Proteomic analysis of urea soluble proteins that are enriched in MS tissue. (Suppl. to Figure 3)** List of proteins that were identified by dimethyl isotope labeling mass spectrometry to be enriched in urea soluble fraction using the sarkosyl extraction protocol in MS brain tissue by greater than 1.5 fold as compared to control tissue. The

samples were prepared by pooling samples from 3 control patients and 3 MS patients and performing two runs on the mass spectrometer. Proteins in red were identified in both runs.

**Table S4. Increased components in the insoluble proteome of MS that were also found in Lewy body of pathological brain samples from PD patients. (Suppl. to Figure 3)** List of proteins hits present in the insoluble fractions of the MS and LB datasets >1.5-fold of their controls were tabulated.

**Table S5. Proteomic analysis of urea soluble proteins that are enriched in MS tissue that are implicated in various neurodegenerative diseases. (Suppl. to Figure 3)** Gene ontology KEGG pathway cluster analysis identified proteins that are implicated in various aspects of Alzheimer's, Parkinson's and Huntington's diseases.

**Table S6. Putative RIPK3 targets in the insoluble proteome of MS. (Suppl. to Figure 3)** RIPK3 logo motif was retrieved from Phosphonetworks database (<http://phosphonetworks.org/>). Phosphorylation motif logo for hits identified in MS samples were predicted using WebLogo (<http://weblogo.berkeley.edu/>).

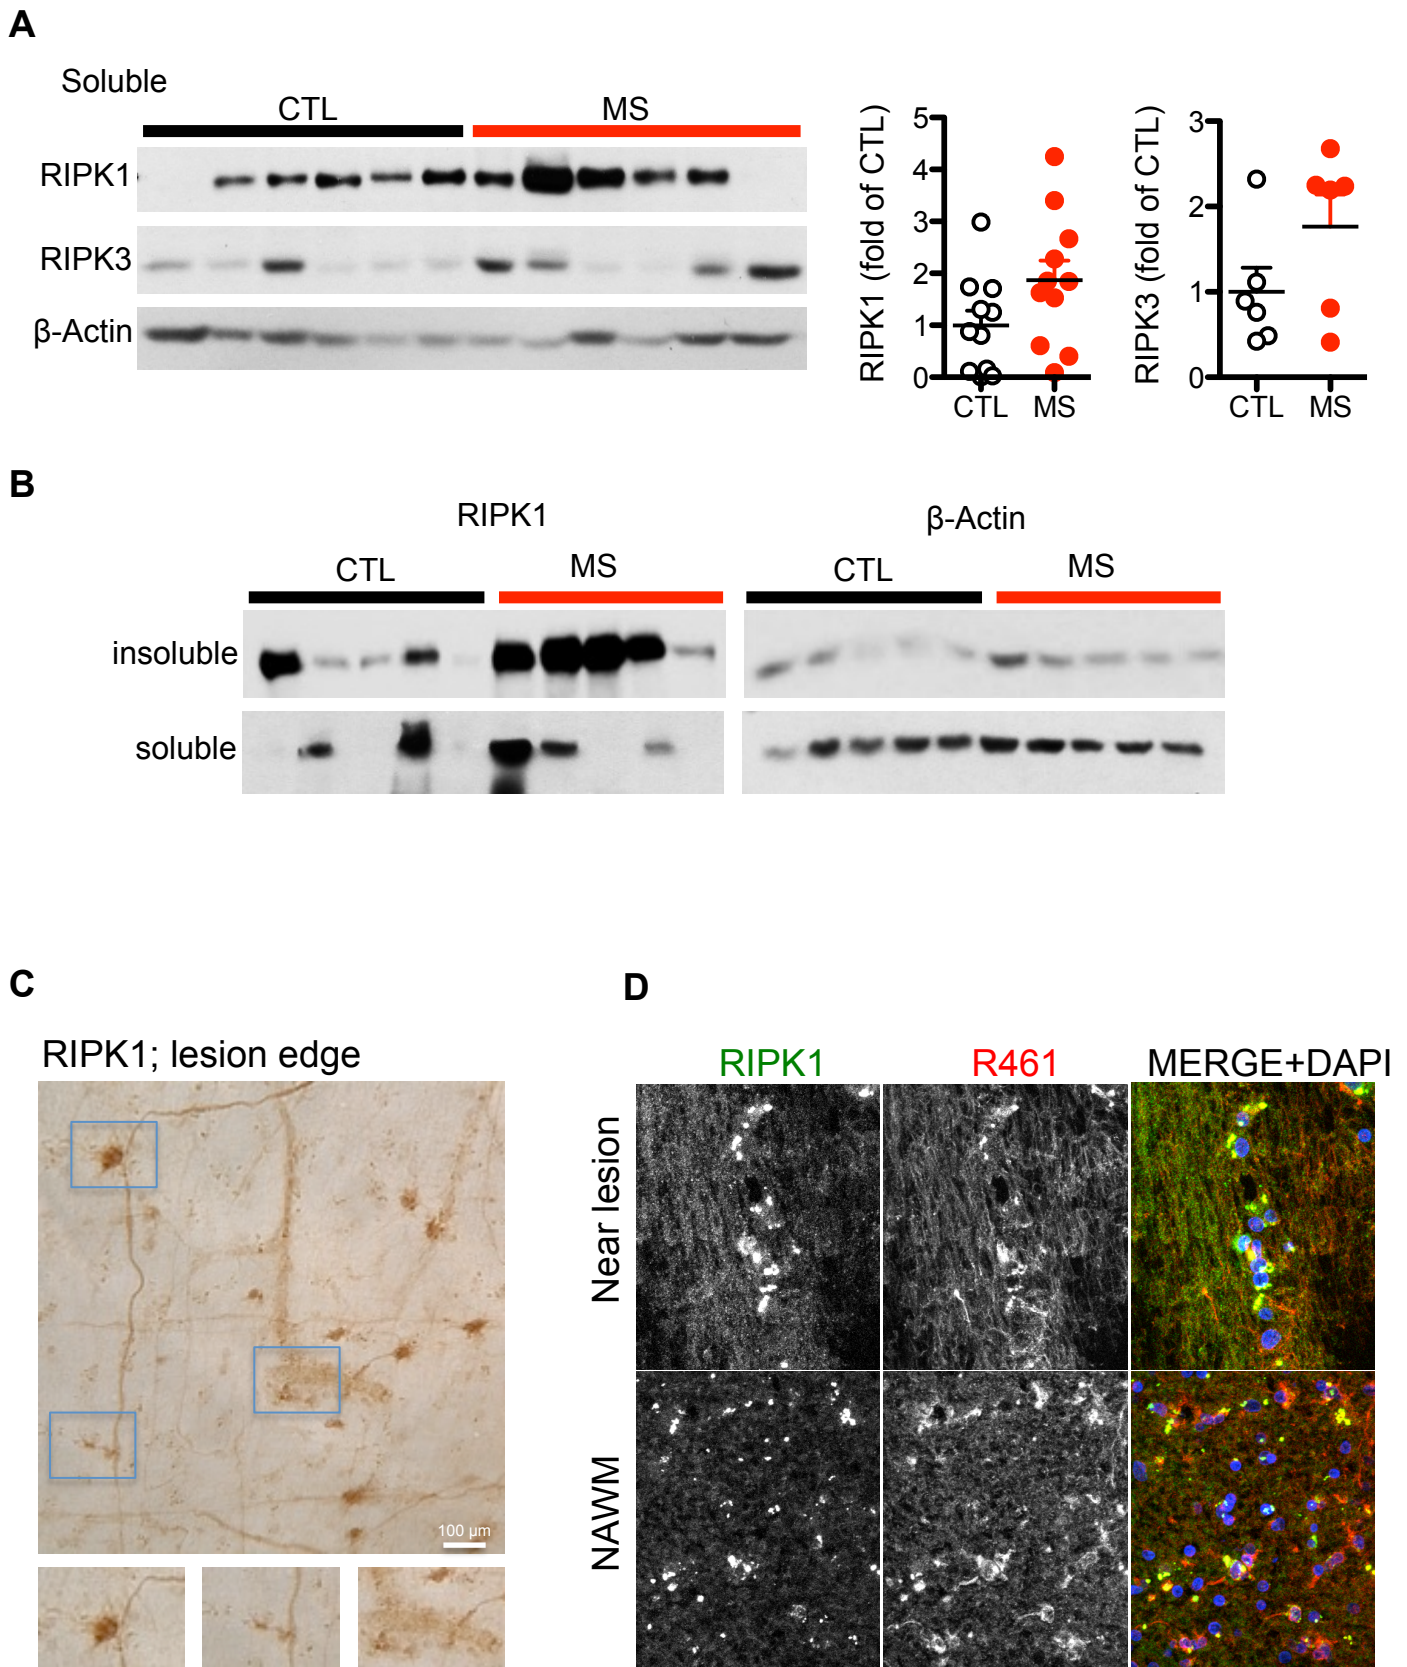

Figure S1

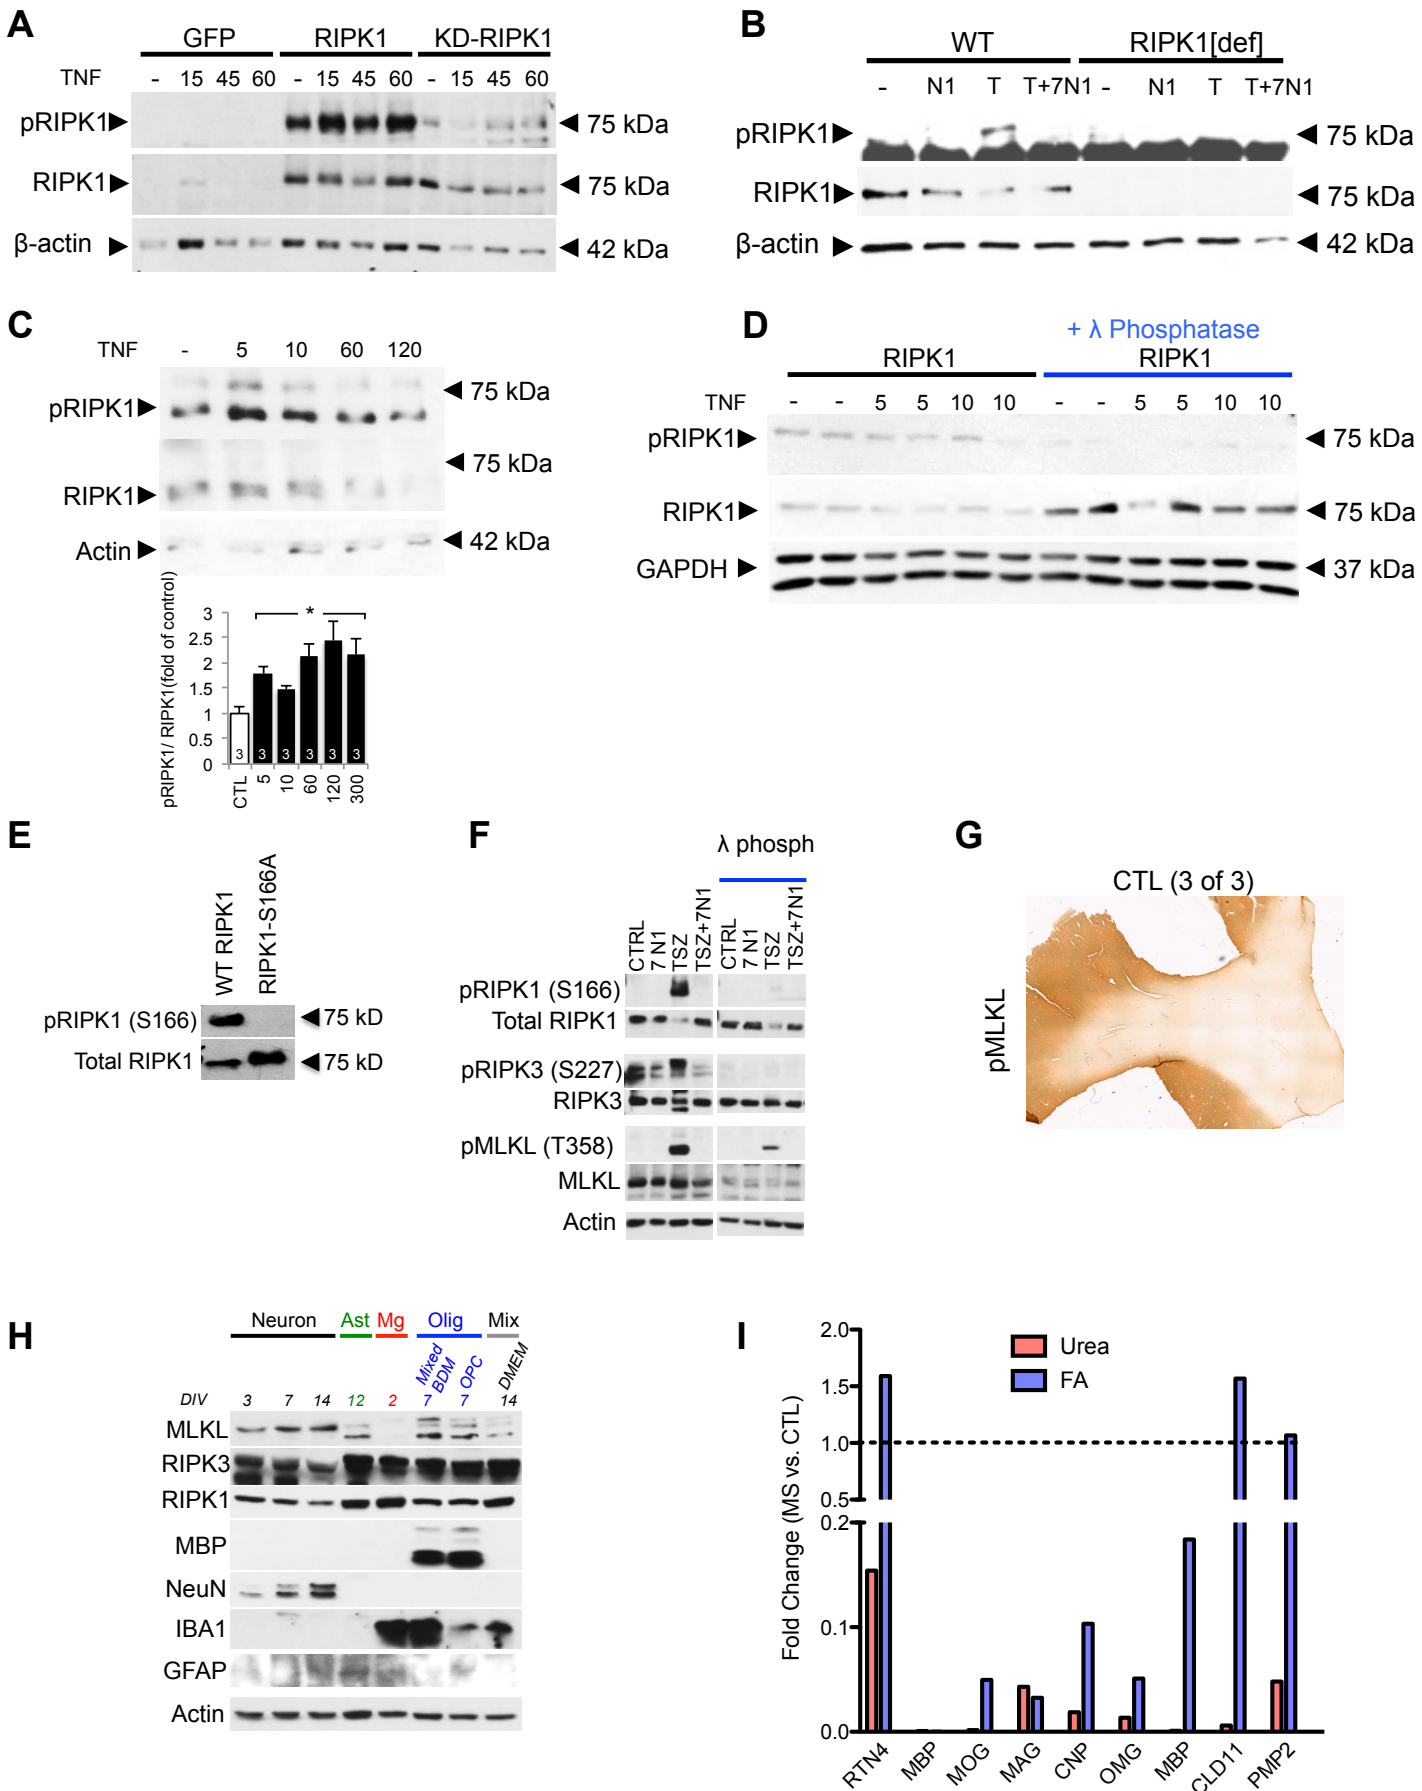

Figure S2

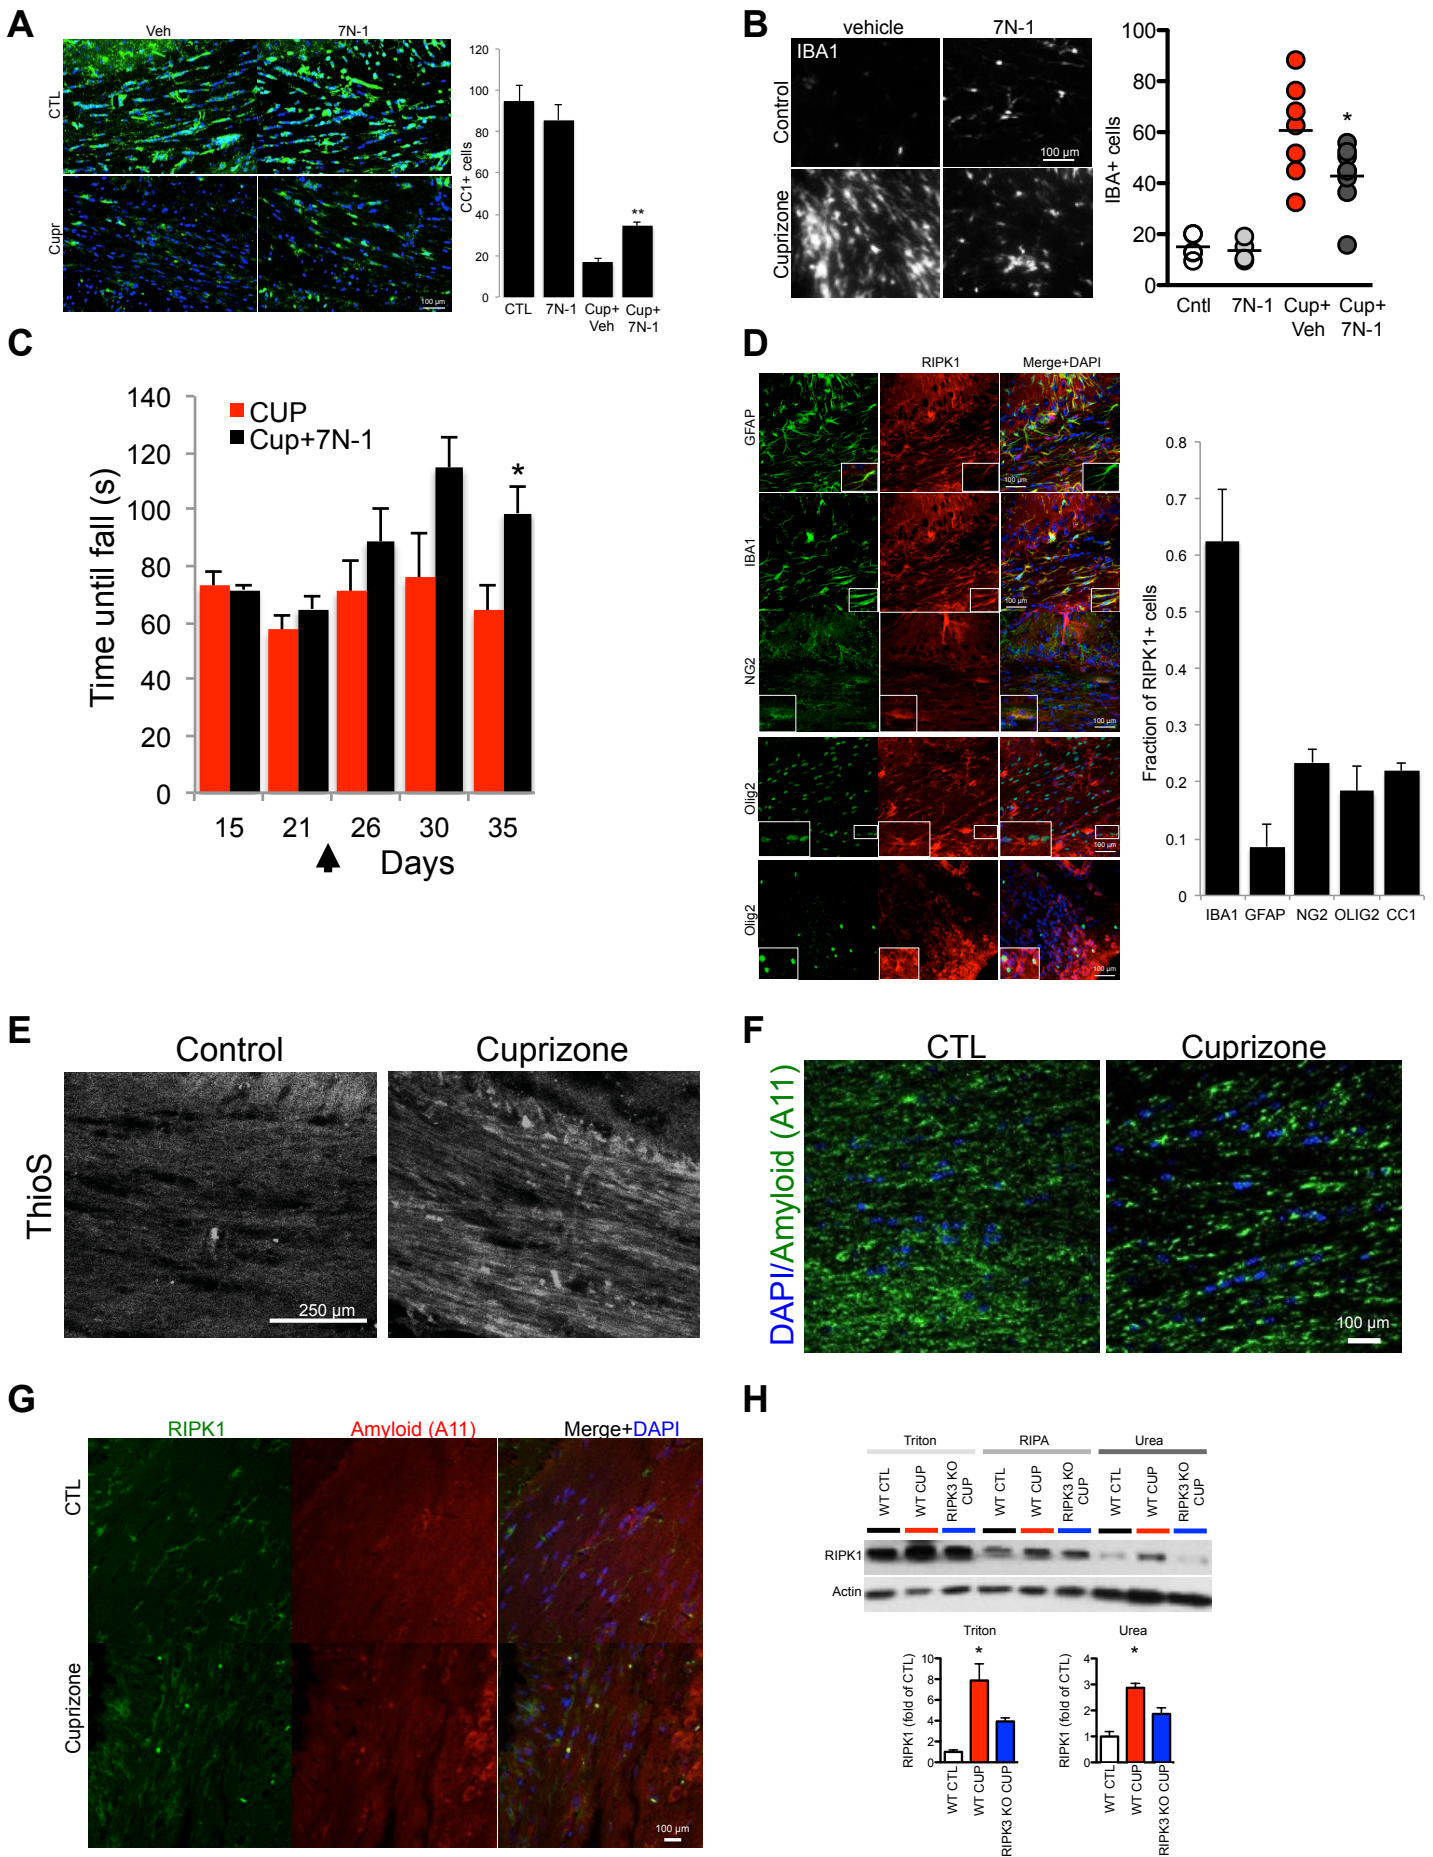

Figure S3

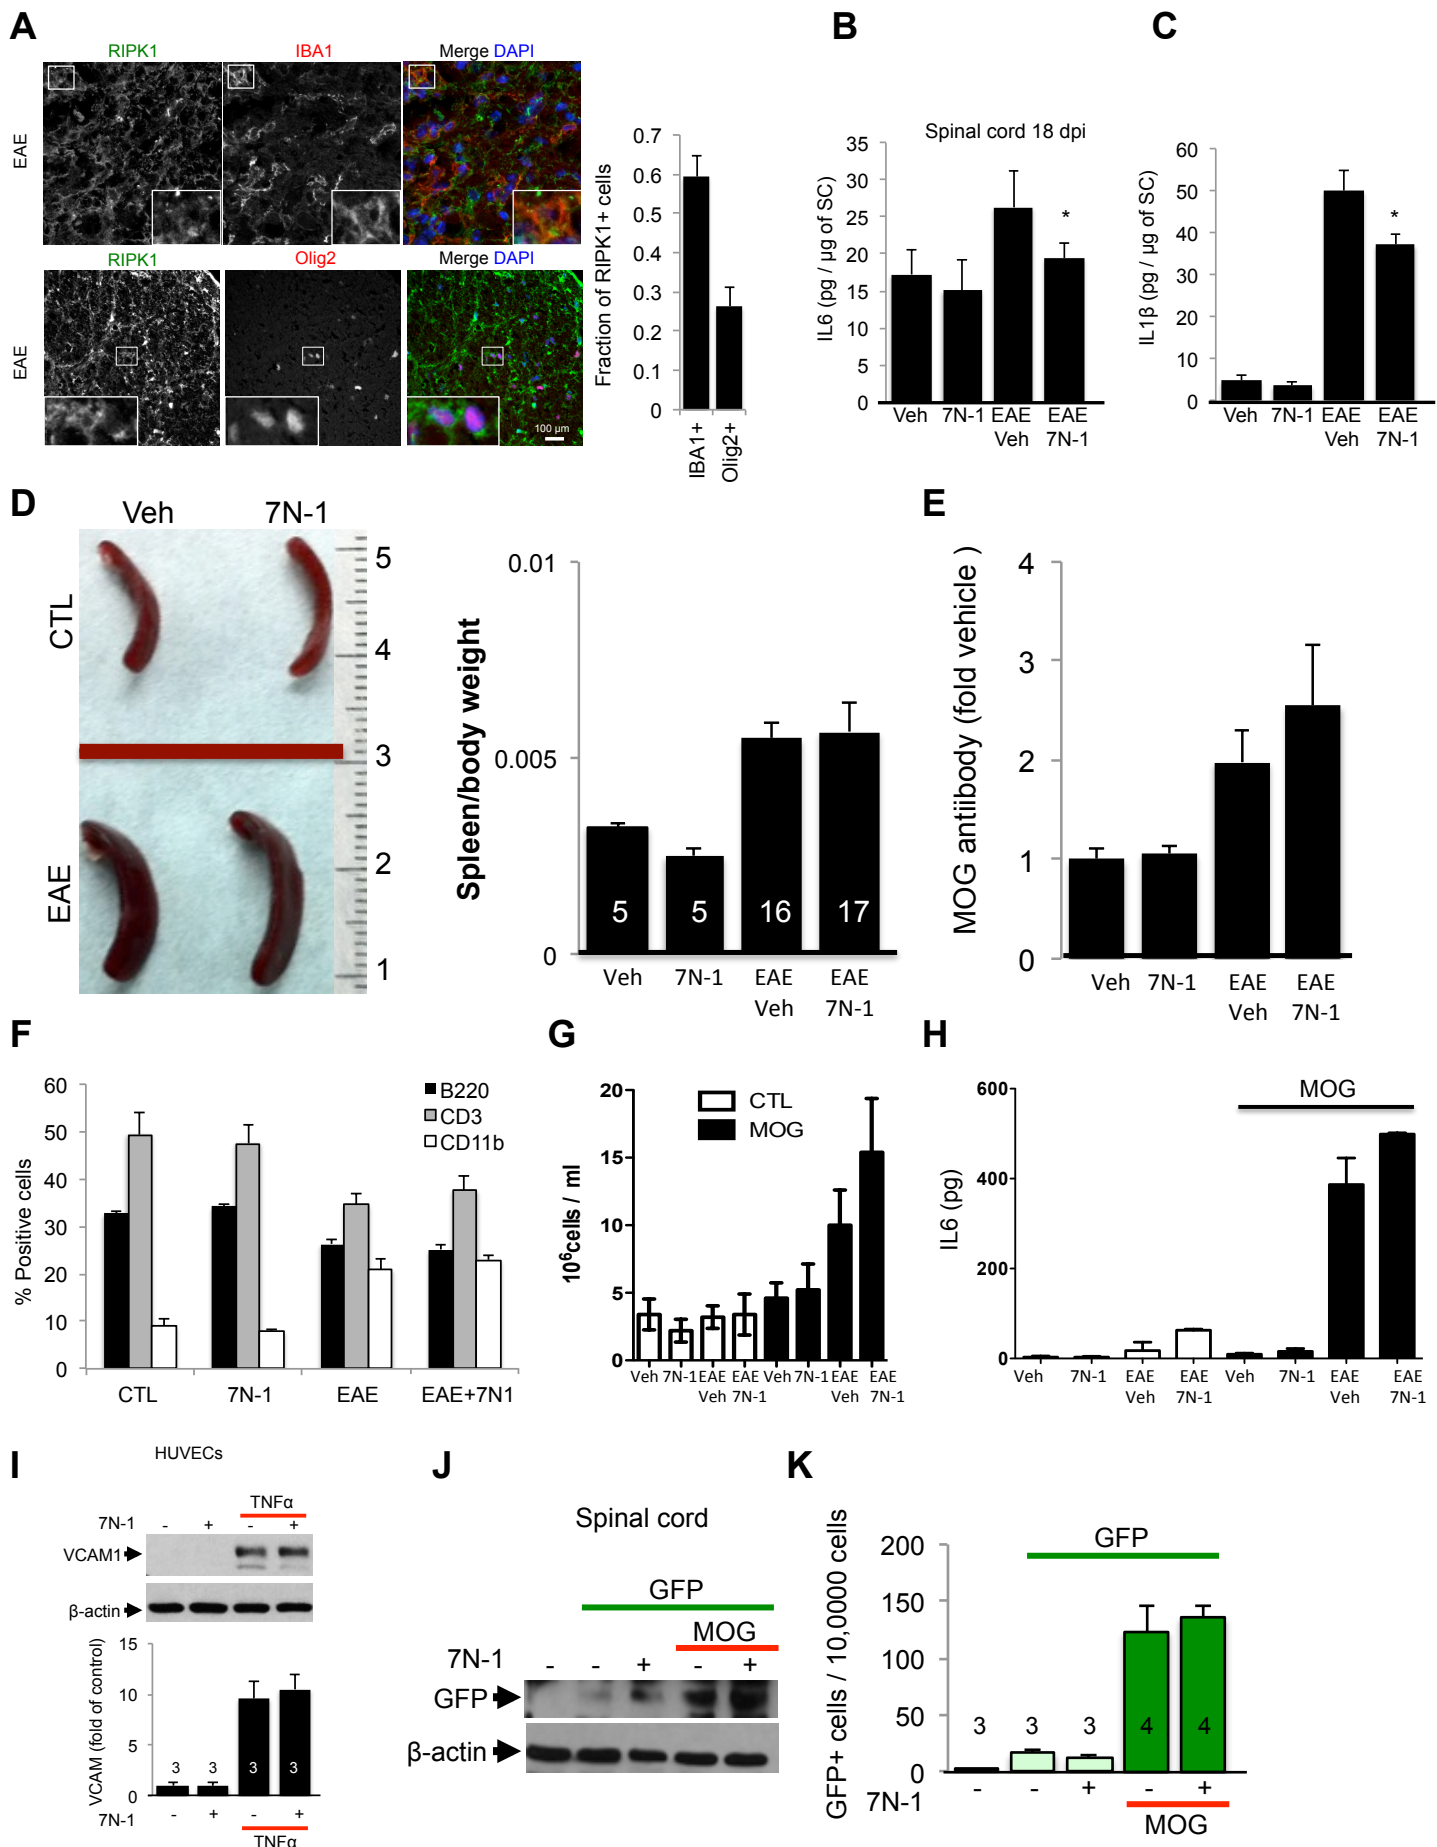

Figure S4

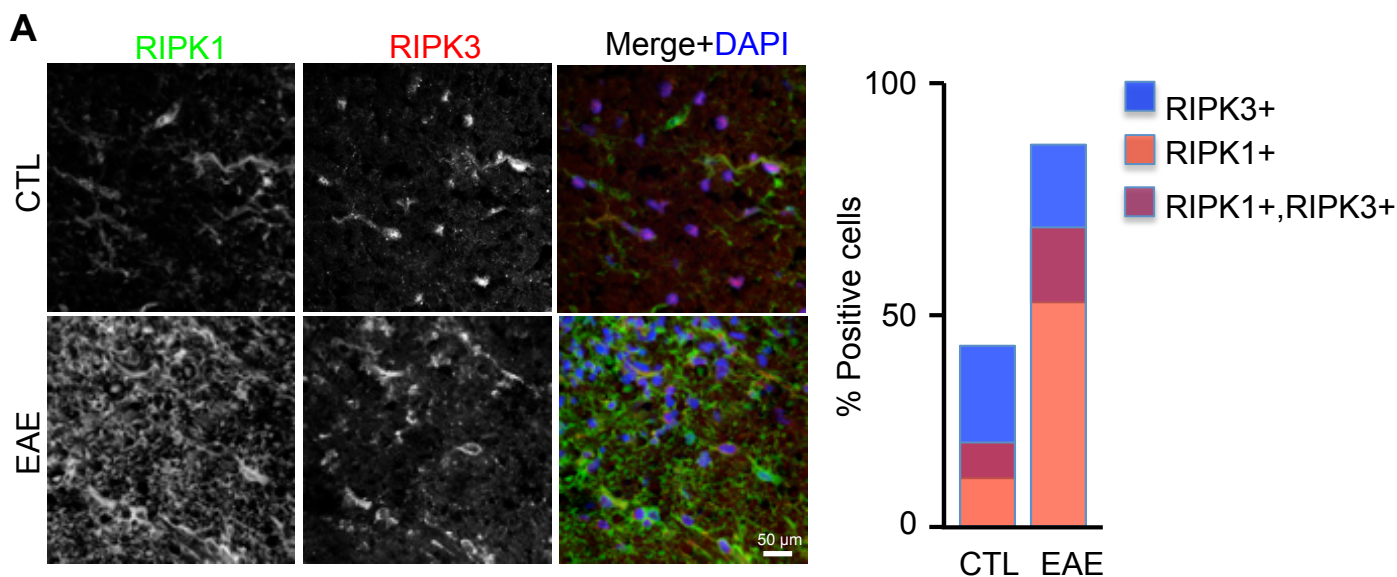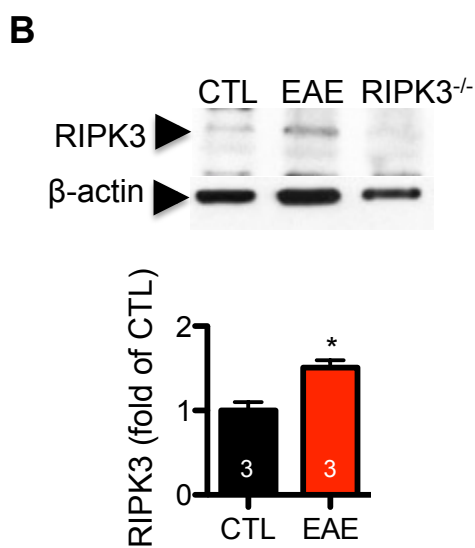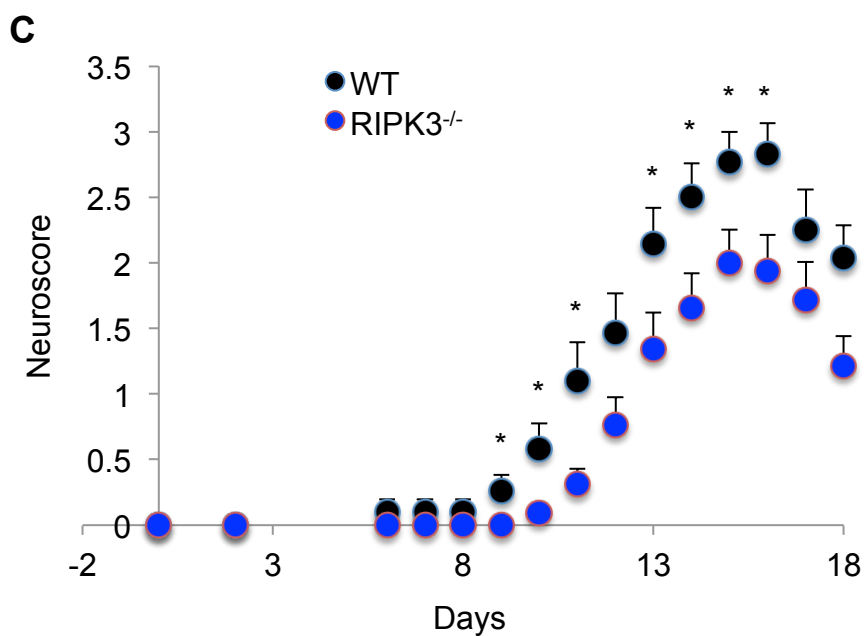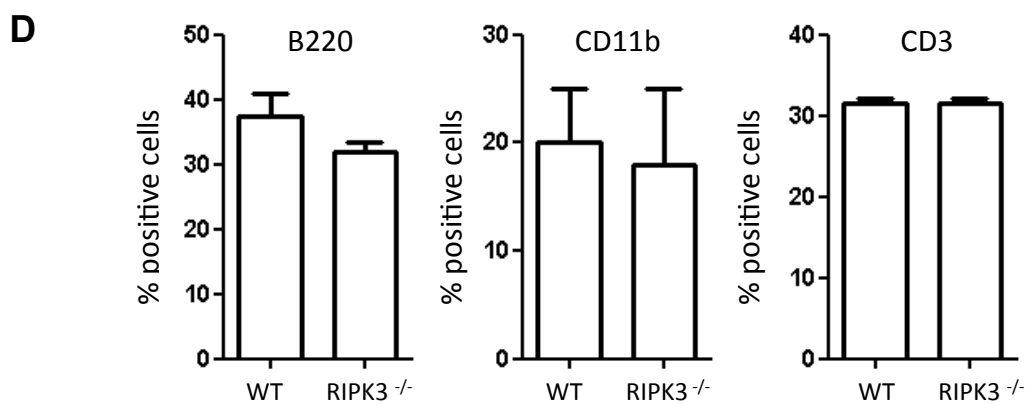

|                      | B220 | CD11b | CD3  |
|----------------------|------|-------|------|
| WT                   | 37.5 | 20    | 31.5 |
| RIPK3 <sup>-/-</sup> | 32   | 18    | 31.5 |

Figure S5

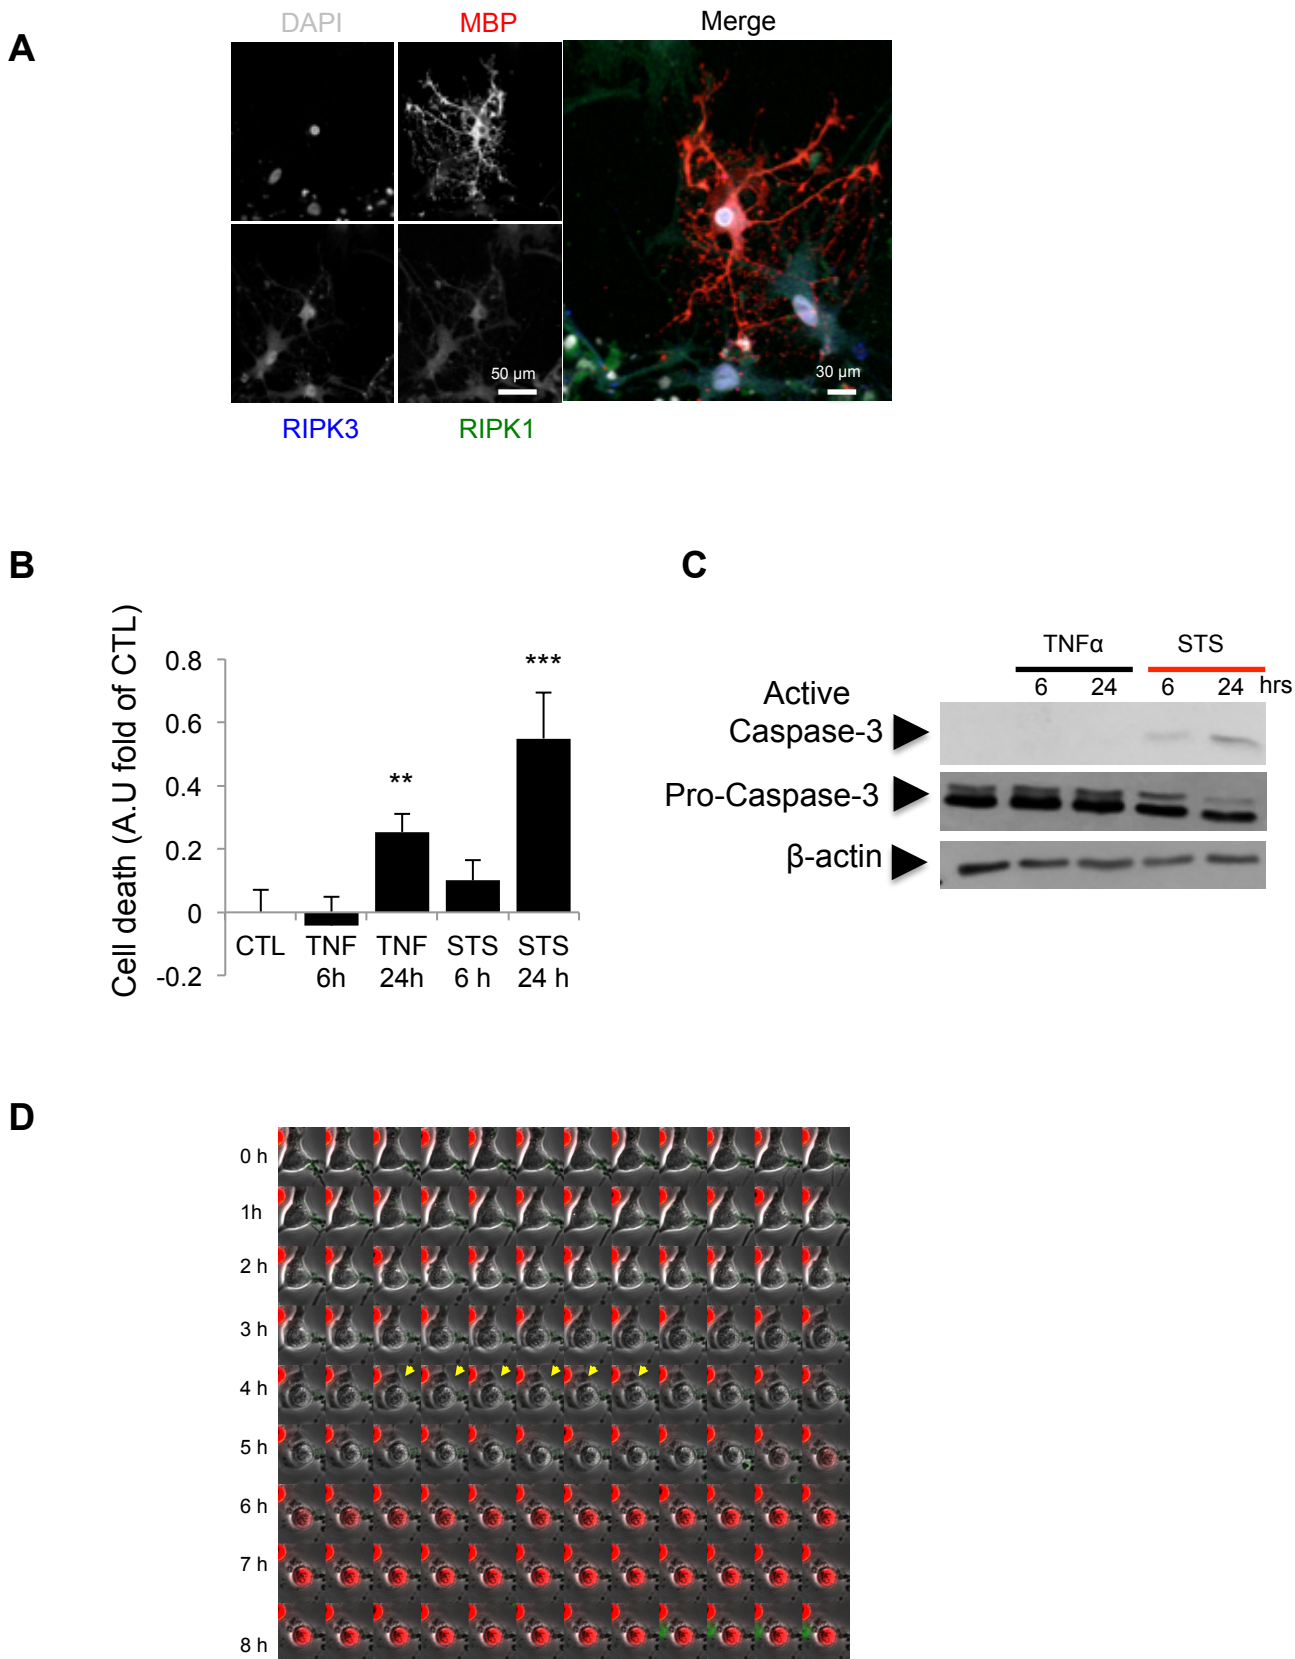

Figure S6



**A**

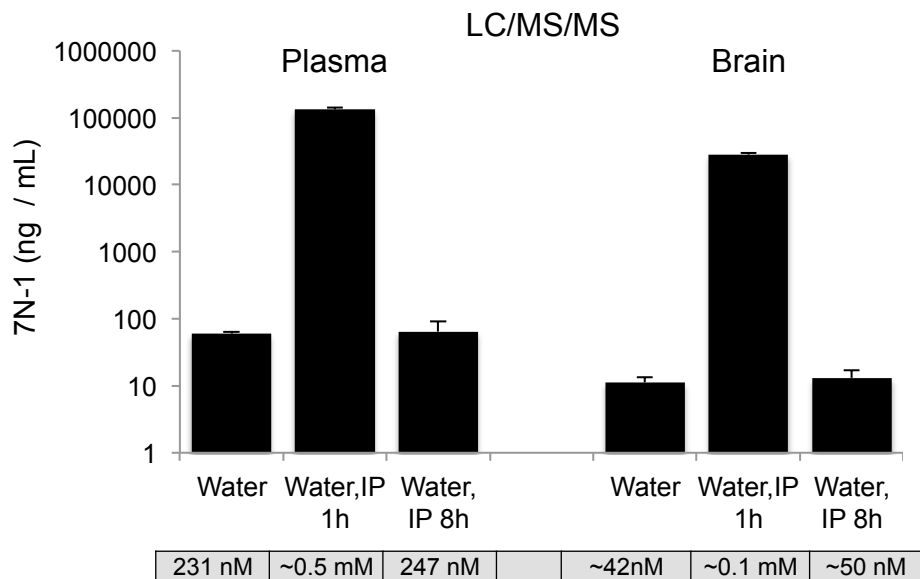

**B**

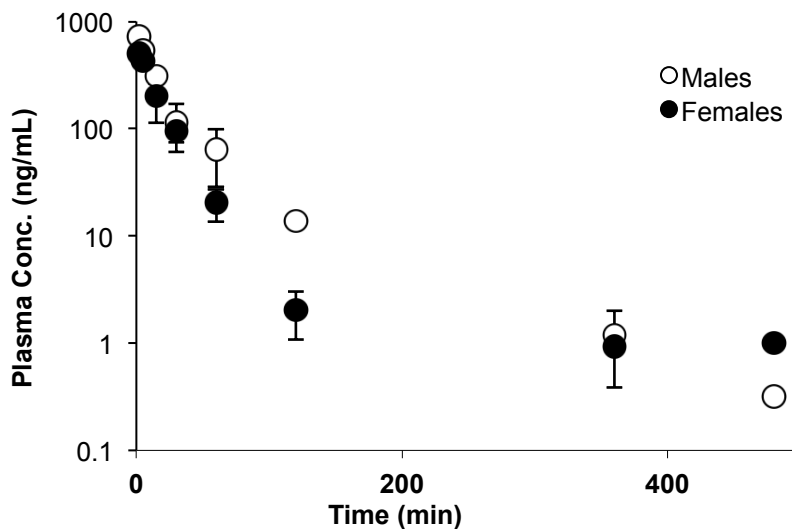

**C**

| Pharmacokinetic Analysis                                                 |              |                               |                             |                        |                        |                                        |                                               |
|--------------------------------------------------------------------------|--------------|-------------------------------|-----------------------------|------------------------|------------------------|----------------------------------------|-----------------------------------------------|
| Table 3 -Pharmacokinetic Parameters for 7-Cl-O-Nec-1 – Males and Females |              |                               |                             |                        |                        |                                        |                                               |
| Group                                                                    | Dose (mg/kg) | AUC <sub>8h</sub> (min*ng/mL) | C <sub>max</sub> ** (ng/mL) | T <sub>max</sub> (min) | T <sub>1/2</sub> (min) | V <sub>SS</sub> (mL.kg <sup>-1</sup> ) | CLs (mL.min <sup>-1</sup> .kg <sup>-1</sup> ) |
| Males                                                                    | 1            | 16461.7                       | 873.1                       | 0                      | 66.5                   | 2494.8                                 | 60.6                                          |
| Females                                                                  | 1            | 9921.4                        | 573.1                       | 0                      | ND                     | 3345.5                                 | 100.0                                         |

\*AUC values normalized to dose

\*\*Extrapolated Value (log linear)

Abbreviations: AUC 8 h – Area under the curve at 8 h; C<sub>max</sub> – estimated maximum plasma concentration; T<sub>max</sub> – time of maximum observed concentration; T<sub>1/2</sub> – terminal elimination half-life; V<sub>ss</sub> – Volume of distribution at steady state; CLs – systemic clearance.

| Patient | RIPK1(s) | RIPK1(u) | RIPK3(u) | Casp-8 | FLIP | Myelin |
|---------|----------|----------|----------|--------|------|--------|
| U-CTL-1 | -        | -        | +        | -      | -    | ++++   |
| U-CTL-2 | +        | +        | +        | +      | -    | ++     |
| U-CTL-3 | +        | +        | +        | -      | -    | ++++   |
| U-CTL-4 | ++       | +        | ++       | +      | -    | ++     |
| U-CTL-5 | +        | N/A      | +        | -      | ++   | +++    |
| U-CTL-6 | ++       | N/A      | +        | -      | +    | ++++   |
| C-CTL-1 | +        | ++       | ++       | -      | +    | +      |
| C-CTL-2 | ++       | +        | +        | -      | ++   | ++++   |
| C-CTL-3 | -        | +        | +        | -      | -    | ++     |
| C-CTL-4 | +++      | +        | +        | -      | ++   | ++     |
| C-CTL-5 | +        | -        | +        | +      | -    | +++    |
| U-MS-1  | ++       | ++++     | ++       | -      | +    | ++     |
| U-MS-2  | +++      | +++      | +++      | +      | ++   | -      |
| U-MS-3  | +++      | ++++     | ++       | +++    | +++  | -      |
| U-MS-4  | ++       | +++      | +        | +++    | +    | -      |
| U-MS-5  | ++       | N/A      | +++      | ++     | ++   | +      |
| U-MS-6  | -        | N/A      | +        | +++    | +    | ++     |
| C-MS-1  | +++      | ++++     | +++      | +++    | ++   | +      |
| C-MS-2  | +++      | ++++     | +++      | +++    | +++  | -      |
| C-MS-3  | +        | +++      | +++      | -      | +    | +      |
| C-MS-4  | ++       | ++++     | ++       | ++     | ++   | ++     |
| C-MS-5  | -        | +        | ++       | +++    | +    | ++     |

Table S1

Upregulated genes in chronic active lesions vs. inactive lesions that are regulators of necroptosis

| Gene Symbol | Entrez Gene ID | Accession # | Mean z-score |
|-------------|----------------|-------------|--------------|
| RNH1        | 107702         | NM_145135   | -6.387663682 |
| ACE         | 11421          | NM_009598   | -3.63454219  |
| TOP1        | 21969          | NM_009408   | -2.50715914  |
| MST1        | 15235          | NM_008243   | -2.204035292 |
| TNFSF10     | 22035          | NM_009425   | -2.201076593 |
| GATA3       | 14462          | NM_008091   | -2.164057656 |
| ZFP36       | 22695          | NM_011756   | -1.69244849  |
| TCEA1       | 21399          | NM_011541   | -1.601099427 |
| Ptk7        | 71461          | NM_175168   | -1.27703078  |
|             |                |             |              |
| BRF1        | 72308          | NM_028193   | 3.509477789  |
| CASP9       | 12371          | NM_015733   | 2.787101711  |
| Sp1         | 20683          | NM_013672   | 2.112424675  |
| IL13        | 16163          | NM_008355   | 2.065390789  |
| HSF4        | 26386          | NM_011939   | 1.741837716  |
| HOXD3       | 15434          | NM_010468   | 1.631447136  |
| PRKAR1B     | 19085          | NM_008923   | 1.471116448  |
| EGR1        | 13653          | NM_007913   | 1.466661463  |
| CD4         | 12504          | NM_013488   | 1.453573802  |
| MAPK1       | 26413          | NM_011949   | 1.431040168  |
| FGFR1       | 14182          | NM_010206   | 1.419384238  |

Proteins enriched by >1.5 fold (MS vs. CTL) in the urea fraction

|          |          |          |             |           |          |          |         |          |          |          |       |
|----------|----------|----------|-------------|-----------|----------|----------|---------|----------|----------|----------|-------|
| AAK1     | ATP2B1   | CKB      | DYNLT3      | GLS       | HSPH1    | MT-CYB   | PANK4   | PSMC4    | SLC1A3   | TUBA1B   | YWHAZ |
| AARS     | ATP2B2   | CKMT1B   | ECHS1       | GLUD1     | IDH2     | MT-ND2   | PARP1   | PSMC5    | SLC25A1  | TUBA1C   |       |
| AASDHPPT | ATP2B3   | CLASP2   | EEF1A1      | GLUL      | IDH3A    | MT-ND4   | PC      | PSMC6    | SLC25A11 | TUBA3D   |       |
| ABAT     | ATP2B4   | CLTC     | EEF1A2      | GNA13     | IDH3B    | MT-ND5   | PCBP2   | PSMD11   | SLC25A12 | TUBA4A   |       |
| ABHD11   | ATP5A1   | CLU      | EEF1D       | GNAI1     | IGHV4-31 | MTCH1    | PCYT2   | PTPLAD1  | SLC25A22 | TUBA8    |       |
| ACAN     | ATP5B    | CMPK1    | EEF1G       | GNAI2     | JMMT     | MTCH2    | PDCD6IP | PURA     | SLC25A3  | TUBAL3   |       |
| ACO2     | ATP5C1   | CNRIP1   | EHD1        | GNAI3     | INA      | MTHFD1   | PDE1B   | PYGB     | SLC25A4  | TUBB     |       |
| ACTB     | ATP5D    | CNTN1    | EHD3        | GNAO1     | INPP1    | MVP      | PDHB    | PYGM     | SLC25A5  | TUBB2A   |       |
| ACTC1    | ATP5F1   | CNTN2    | EIF1        | GNB1      | IPO5     | MYH10    | PDIA3   | RAB10    | SLC25A6  | TUBB2B   |       |
| ACTG1    | ATP5H    | COPS4    | EIF1B       | GNB2      | IPO7     | MYH9     | PDK3    | RAB14    | SLC3A2   | TUBB2C   |       |
| ACTR1A   | ATP5L    | CORO1A   | EIF3F       | GNB4      | IPO9     | MYO5A    | PDXK    | RAB3A    | SLC4A4   | TUBB3    |       |
| ACTR1B   | ATP5O    | COX4I1   | EIF4A1      | GNG12     | IQSEC1   | NAGK     | PEA15   | RAB7A    | SNAP25   | TUBB4    |       |
| ACTR2    | ATP6V0A1 | COX5A    | EIF4H       | GNL1      | KCNAB2   | NAMPT    | PFKL    | RAC1     | SNAP91   | TUBB6    |       |
| ACTR3    | ATP6V1A  | COX5B    | EIF5A       | GPI       | KIAA1045 | NAP1L1   | PFKM    | RAD23A   | SNORA41  | TUBB8    |       |
| ADD1     | ATP6V1B2 | COX6B1   | ELAVL1      | GPM6A     | KIAA1468 | NCDN     | PFKP    | RANBP1   | SNTA1    | TUBB5    |       |
| ADD3     | ATP6V1C1 | COX7A1   | ENO1        | GSN       | KIAA1598 | NDRG2    | PFN1    | RANP1    | SOD2     | TUFM     |       |
| AHSA1    | ATP6V1E1 | CPLX2    | ENO2        | GSTM1     | KIF21A   | NDUFA10  | PFN2    | RAP1GDS1 | SPTAN1   | TWF2     |       |
| AK1      | BRP44    | CRYAB    | ENOPH1      | GSTM2     | KIF5B    | NDUFA12  | PGAM1   | RAP2A    | SPTBN1   | TXNDC5   |       |
| AK5      | C10orf58 | CSE1L    | ENPP6       | GSTM3     | KIF5C    | NDUFA13  | PGK1    | RAP2B    | SPTBN4   | TXNRD1   |       |
| AKAP12   | C11orf2  | CST3     | EPB41L1     | GSTM4     | KPNB1    | NDUFA4   | PGRMC1  | RAPGEF2  | SRGAP3   | UBA1     |       |
| ALDH1L1  | C1QBP    | CSTB     | EPB41L2     | GUK1      | KRAS     | NDUFA5   | PHB     | RDH11    | ST13     | UBA6     |       |
| ALDH2    | CA2      | CTNNA2   | EPB41L3     | H2AFX     | KRT78    | NDUFA9   | PHB2    | REEP2    | ST13P4   | UBE2N    |       |
| ALDH6A1  | CALR     | CTNNB1   | EPS15       | H2AFY     | LAP3     | NDUFB10  | PHGDH   | RHOA     | STAM     | UBXN6    |       |
| ALDOA    | CAMK1D   | CTNND1   | ERLIN2      | H3F3A     | LGALS1   | NDUFB11  | PHYHPL  | RHOB     | STK39    | UCHL1    |       |
| ALDOC    | CAMK2A   | CTNND2   | ESD         | HADHA     | LGI1     | NDUFS1   | PIK3R1  | RHOC     | STOM     | UQCRB    |       |
| AMPH     | CAMK2B   | CYB5B    | ESYT1       | HEPACAM   | LHPP     | NDUFS2   | PIN1    | RHOG     | STX1B    | UQCRC1   |       |
| ANK2     | CAMK2D   | DCLK1    | EZR         | HIST2H2AB | LLGL1    | NDUFS3   | PKP4    | RNH1     | STXBP1   | UQCRC2   |       |
| ANLN     | CAMK2G   | DCLK2    | FAM49A      | HIST2H4B  | LONP1    | NDUF55   | PLEC    | RPL13    | SUCLA2   | UQCRCF51 |       |
| ANXA1    | CAMKV    | DCTN1    | FASN        | HK1       | LRPPRC   | NDUFV1   | PLEKHB1 | RPL27A   | SUCLG1   | UQCRH    |       |
| ANXA5    | CANX     | DCTN2    | FBXO2       | HNRNPA1   | LY6H     | NDUFV2   | PMVK    | RPL6     | SUGT1    | USMG5    |       |
| ANXA6    | CAP1     | DCXR     | FHL1        | HNRNPA2B1 | MAOB     | NEFH     | PPIA    | RPLP1    | SYN1     | USO1     |       |
| AP2A1    | CAP2     | DDX1     | FKBP1A      | HNRNPC    | MAP1A    | NEFL     | PPP1CB  | RPS13    | SYN2     | USP24    |       |
| AP2A2    | CARNS1   | DDX3X    | FKBP4       | HNRNPH1   | MAP1B    | NEFM     | PPP1CC  | RRAS     | SYNJ1    | USP5     |       |
| AP3M2    | CARS     | DIRAS2   | FLOT1       | HNRNPH2   | MAP2     | NEGR1    | PPP1R7  | RRAS2    | TAGLN2   | VAPB     |       |
| AQP1     | CAV1     | DLD      | FSCN1       | HNRNPH3   | MAP2K1   | NFASC    | PPP2CA  | RTN1     | TAGLN3   | VARS     |       |
| AQP4     | CBR1     | DNM1     | FSD1L       | HNRNPK    | MAPK3    | NIPSNAP1 | PPP2R1A | RUFY3    | TBCB     | VCAN     |       |
| ARF3     | CCT2     | DNM1L    | FXYD6       | HNRNPL    | MAPRE2   | NNT      | PPP2R2A | S100A8   | THY1     | VDAC1    |       |
| ARHGAP1  | CCT3     | DNM2     | FXYD6-FXYD2 | HNRNPU    | MAPRE3   | NRAS     | PPP2R4  | SAMM50   | TKT      | VDAC2    |       |
| ARHGDI   | CCT4     | DNM3     | FYN         | HP        | MARCKS   | NRBP1    | PPP2R5D | SBF1     | TLN1     | VDAC3    |       |
| ARL1     | CCT6A    | DOCK3    | GAN         | HPCAL4    | MATR3    | NRBP2    | PPP2R5E | SCRN1    | TLN2     | VGFB     |       |
| ARL8A    | CD59     | DPYSL2   | GANAB       | HRAS      | MC1R     | NSF      | PRDX3   | SDR39U1  | TMOD2    | VIM      |       |
| ARPC5L   | CD81     | DPYSL3   | GAP43       | HSP90AA1  | MDH2     | NTM      | PRDX5   | SESTD1   | TNR      | VP52     |       |
| ASNA1    | CD9      | DPYSL4   | GAPDH       | HSP90AB1  | METTL7A  | NUMA1    | PREPL   | SFXN1    | TOLLIP   | VTA1     |       |
| ATIC     | CDC42    | DST      | GDAP1       | HSPA12A   | MGST3    | OGDH     | PRKACB  | SFXN3    | TOM1     | WDR1     |       |
| ATL1     | CDS2     | DSTN     | GDAP1L1     | HSPA1B    | MIR1248  | OLA1     | PRKAG1  | SH3BGL3  | TOM1L2   | XPO1     |       |
| ATP1A1   | CEP170   | DYNC1H1  | GFAP        | HSPA1L    | MLC1     | OSTF1    | PRKAR1A | SH3GL2   | TPI1     | YWHAB    |       |
| ATP1A2   | CFL1     | DYNC1I1  | GIT1        | HSPA8     | MOBP     | OTUB1    | PRKCA   | SH3GLB2  | TPPP     | YWHAE    |       |
| ATP1A3   | CHMP5    | DYNC1I2  | GJA1        | HSPA9     | MSN      | OXCT1    | PRKCB   | SIRT5    | TPRG1L   | YWHAG    |       |
| ATP1B1   | CISD1    | DYNC1LI2 | GLIPR2      | HSPB1     | MT-CO2   | PAFAH1B3 | PRKCG   | SLC14A1  | TRIM2    | YWHAH    |       |
| ATP2A2   | CKAP5    | DYNLL1   | GLO1        | HSPB6     | MT-CO3   | PALM     | PSMA2   | SLC1A2   | TUBA1A   | YWHAQ    |       |

Increased components in the insoluble proteome of MS that were also found in Lewy body of pathological brain samples from PD patients.

|          |          |          |          |       |
|----------|----------|----------|----------|-------|
| AARS     | COPB1    | GPI      | PLEC     | VPS35 |
| ABCD3    | COPB2    | GSN      | POR      | WDR1  |
| ACOT7    | COPZ1    | GSTM3    | PPP2R4   | WDR7  |
| ACTN1    | CORO1A   | HIBCH    | PRDX3    | XPO1  |
| ACTR2    | CPT2     | HNRNPD   | PRDX5    | YWHAE |
| ADD1     | CRYM     | HSD17B10 | PRKCB    |       |
| ADD3     | CSE1L    | HSDL2    | PRODH    |       |
| ADSS     | CTNNA2   | HSP90AB1 | PROSC    |       |
| AFG3L2   | CTNND1   | HSPA4L   | PSMC6    |       |
| AIDA     | CTSD     | HSPB1    | PSMD2    |       |
| AKR1A1   | DCLK1    | IPO5     | PYGB     |       |
| AKR1C1   | DCTN1    | IPO7     | RAB23    |       |
| ALDH4A1  | DCTN2    | KARS     | RAN      |       |
| ALDH6A1  | DDX1     | LASP1    | RAP1GDS1 |       |
| ALDOC    | DGKB     | MACF1    | RCN1     |       |
| ANKFY1   | DNAJB1   | MAP1A    | ROCK2    |       |
| ANXA6    | DNM1L    | MAP1B    | RTN1     |       |
| AP2A1    | DPYSL2   | MAP2K1   | SAR1A    |       |
| AP2B1    | DTNA     | MFN2     | SDHB     |       |
| AP3S1    | DYNC1H1  | MPP6     | SEC22B   |       |
| ARHGDI1  | DYNC1I1  | MTCH2    | SH3GL2   |       |
| ARMC10   | DYNC1LI2 | MTHFD1   | SH3GLB2  |       |
| ATIC     | EEF1A2   | MYH10    | SNTA1    |       |
| ATL1     | EEF2     | NANS     | SPTAN1   |       |
| ATP2A2   | EHD3     | NAPB     | SPTBN1   |       |
| ATP6V1A  | ELMO1    | NCDN     | STUB1    |       |
| ATP6V1B2 | ELMO2    | NNT      | SYN1     |       |
| ATP6V1E1 | ENO1     | NUDC     | TBCB     |       |
| BLVRB    | EPRS     | OPA1     | TCP1     |       |
| CA1      | EXOC8    | OTUB1    | THNSL1   |       |
| CADPS    | FAM49A   | PAFAH1B1 | TLN2     |       |
| CANX     | FARSB    | PDE1B    | TPI1     |       |
| CAP1     | FASN     | PDIA3    | TPP1     |       |
| CBR1     | FBXO2    | PDIA6    | TPPP     |       |
| CCT2     | FERMT3   | PDK2     | TRAP1    |       |
| CDH2     | FH       | PDXK     | UBA1     |       |
| CFL1     | FKBP2    | PFN1     | UCHL1    |       |
| CLIC4    | FSCN1    | PGAM1    | USO1     |       |
| CLTC     | FUK      | PGRMC1   | VAPB     |       |
| COPA     | GANAB    | PHGDH    | VARS     |       |

Table S4

Proteins enriched by >1.5 fold (MS vs. CTL) in the urea fraction that are associated with PD, HD or AD

|        |         |         |         |
|--------|---------|---------|---------|
| AP2A1  | COX5A   | NDUFB10 | UBA1    |
| AP2A2  | COX5B   | NDUFS1  | UCHL1   |
| ATP2A2 | COX6B1  | NDUFS2  | UQCR    |
| ATP5A1 | COX7A1  | NDUFS3  | UQCRB   |
| ATP5B  | DCTN1   | NDUFS5  | UQCRC1  |
| ATP5C1 | DCTN2   | NDUFV1  | UQCRFS1 |
| ATP5D  | GAPDH   | NDUFV2  | UQCRH   |
| ATP5F1 | MAPK3   | PIN1    | VDAC1   |
| ATP5H  | NDUFA10 | SLC25A4 | VDAC2   |
| ATP5O  | NDUFA4  | SLC25A5 | VDAC3   |
| CLTC   | NDUFA5  | SLC25A6 | UQCRC2  |
| COX4I1 | NDUFA9  | SOD2    |         |

## Putative RIPK3 targets in MS urea fraction

| Site/motif |         | Site/motif |         |
|------------|---------|------------|---------|
| ADD1       | S358    | HNRNPC     | SA site |
| ANK2       | S1461   | HSP90AA1   | S263    |
| AP3B2      | S272    | HSP90AB1   | S226    |
| ARMC10     | SY site | MAP1A      | S909    |
| BASP1      | T36     | MAP1B      | S832    |
| CLDN11     | S198    | MAP2       | S136    |
| CLNS1A     | S102    | MLF2       | S238    |
| CRYAB      | SW site | NEFH       | S503    |
| CTNNA2     | S640    | OSTF1      | S213    |
| DAAM2      | S656    | PLCL1      | T556    |
| DNAJC5     | S10     | PRKCA      | SF site |
| DYNC1I1    | S179    | PTGES3     | S113    |
| EEF1D      | S162    | RPLP1      | S101    |
| EPB41L1    | S678    | RPLP2      | S102    |
| EPB41L2    | S39     | SEPTIN2    | S218    |
| EPB41L3    | S708    | STX1A      | S14     |
| GIT1       | S362    | STX1B      | S14     |
| HEPACAM    | SL site | UFL1       | S458    |
